# Supplementary material
Source: MDPI journal article supplement (https://www.mdpi.com/2073-4433/13/11/1783)
Supplement: s1 [file s1]

# Supplementary Materials:

Yifu Ou <sup>1</sup>, Ji Zheng <sup>1</sup> and Kyung-Min Nam <sup>1,2,\*</sup>

Table S1. List of Abbreviations.

| Abbreviations   | Description                                                     |
|-----------------|-----------------------------------------------------------------|
| CFI             | Comparative fit index                                           |
| CO              | Carbon monoxide                                                 |
| CO <sub>2</sub> | Carbon dioxide                                                  |
| GDP             | Gross domestic product                                          |
| GDP_PC          | GDP per capita (RMB)                                            |
| MPK_SHR         | Urban rail passenger kilometers share                           |
| MTR_DEN         | Urban rail line density (km/km <sup>2</sup> )                   |
| NFI             | Normed fit index                                                |
| NO <sub>2</sub> | Nitrogen dioxide                                                |
| POLYCENT        | Number of urban centers                                         |
| POP             | Urban population (thousand persons)                             |
| POP_DEN         | Urban population density (person/km <sup>2</sup> )              |
| R_CO2           | Carbon emissions from on-road vehicles (10 <sup>4</sup> tonnes) |
| RMSEA           | Root mean square error of approximation                         |
| TLI             | Tucker-Lewis Index                                              |
| TOD             | Transit-oriented development                                    |
| VKT             | Vehicle kilometers traveled                                     |
| VKT_PV          | Vehicle kilometer traveled per vehicle                          |
| VMT             | Vehicle miles traveled                                          |
| VO              | Vehicle ownership (thousand vehicles)                           |
